# Supplementary material for: Structure and bonding in crystalline cesium uranyl tetrachloride under pressure
Source: Royal Society of Chemistry journal article supplement (doi:10.1039/c6cp03876j), 2016-01-01
Supplement: c6cp03876j1.pdf [file c6cp03876j1.pdf]

Supporting Information for

# Structure and Bonding in Crystalline Cesium Uranyl Tetrachloride under Pressure

Hussien H. Osman<sup>a,b</sup>, Pilar Pertierra<sup>a</sup>, Miguel A. Salvadó<sup>a,\*</sup>,  
F. Izquierdo-Ruiz<sup>a</sup>, J. M. Recio<sup>a</sup>

<sup>a</sup>*MALTA-Consolider Team and Departamento de Química Física y  
Analítica,*

*Universidad de Oviedo, E-33006, Oviedo, Spain.*

<sup>b</sup>*Department of Chemistry, Faculty of Science,  
Helwan University, Ain-Helwan, 11795, Cairo, Egypt*

## I. Electron density study

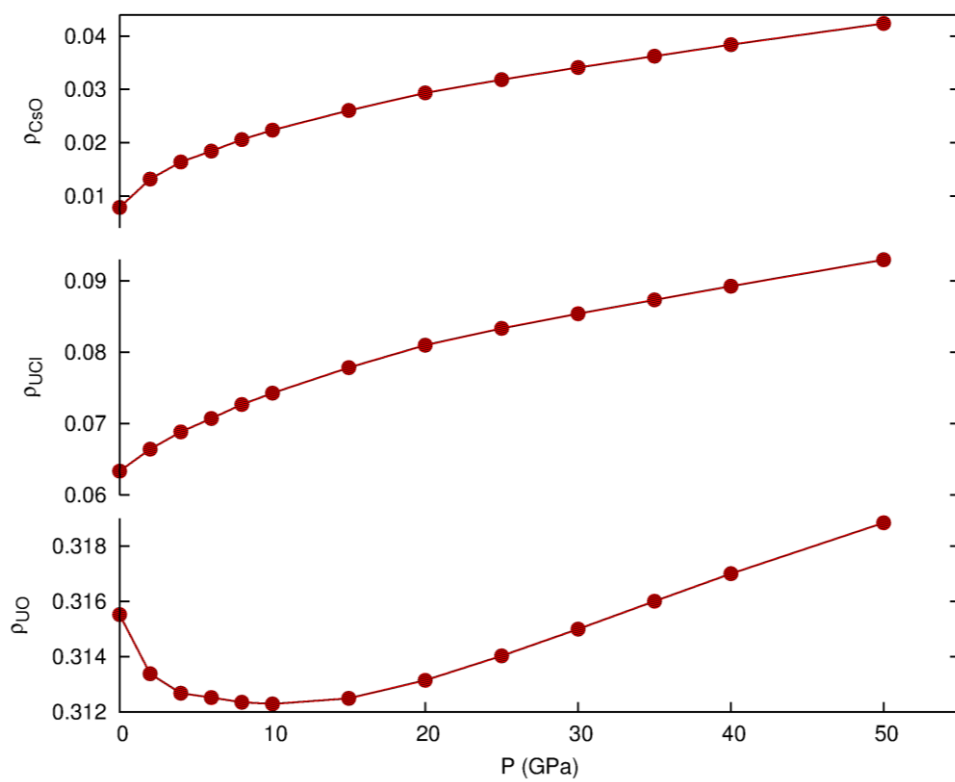

**Figure S1.** Electron density ( $e/\text{bohr}^3$ ) at the critical bond points at several pressures.

## II. Electronic structure calculations in a model system

### Computational Details

Cluster calculations were performed using the Gaussian09 code with two functionals, B3LYP (hybrid) and PBE (GGA), Dunning augmented double-z basis were used for Cs, O and Cl atoms. For U atoms a 60 electron pseudopotential was used in combination with a double-z basis.

A grid of U-Cl and U-Cs fixed distances was made. U-Cl distances ranged from 2.4 to 2.8 Å in steps of 0.01 Å and U-Cs distances ranged from 4.0 to 5.5 Å in steps of 0.02 Å. The rest of the internal coordinates were optimized for each point of the grid.

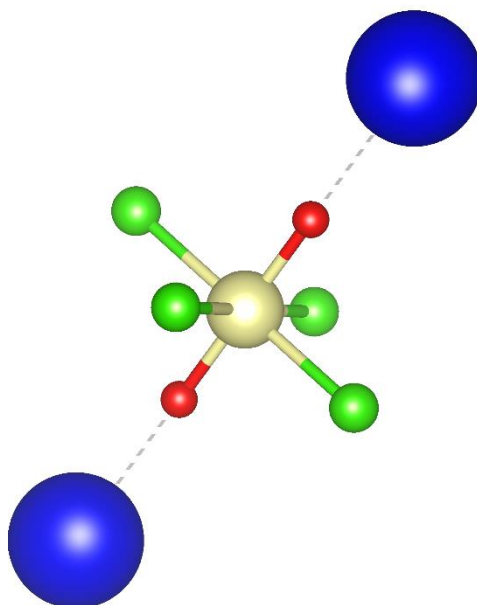

**Figure S2.** A representation of the model system (U = yellow, O = red, Cl = green, Cs = blue).

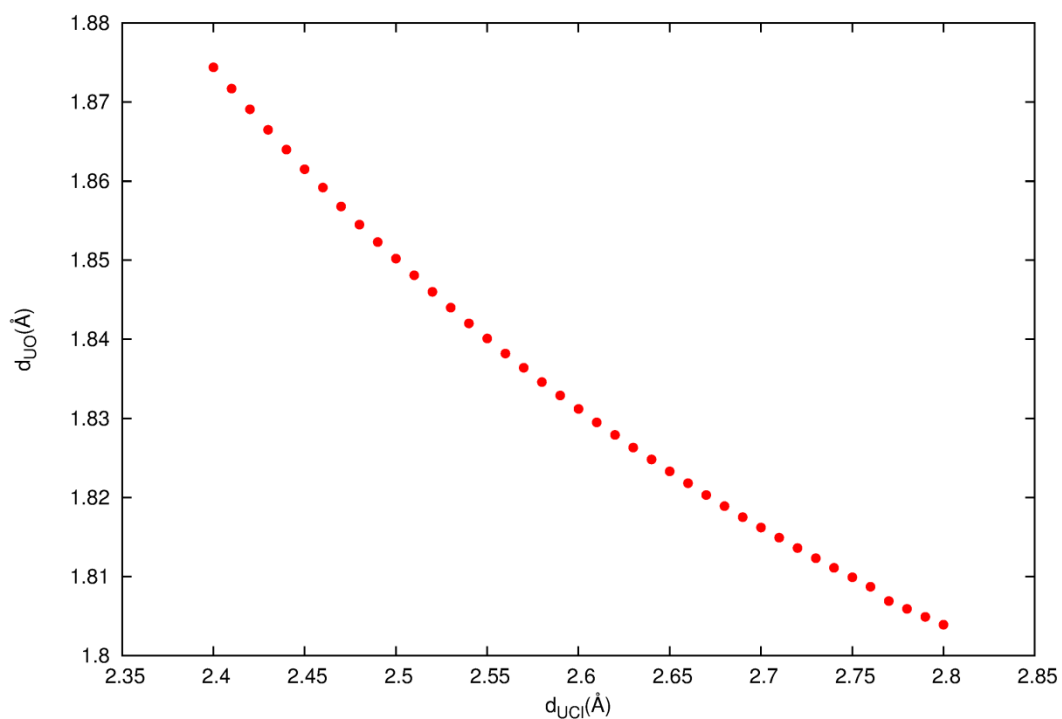

**Figure S3.** U-O vs U-Cl distances obtained in the cluster calculations (U-Cs fixed at 5.1 Å)

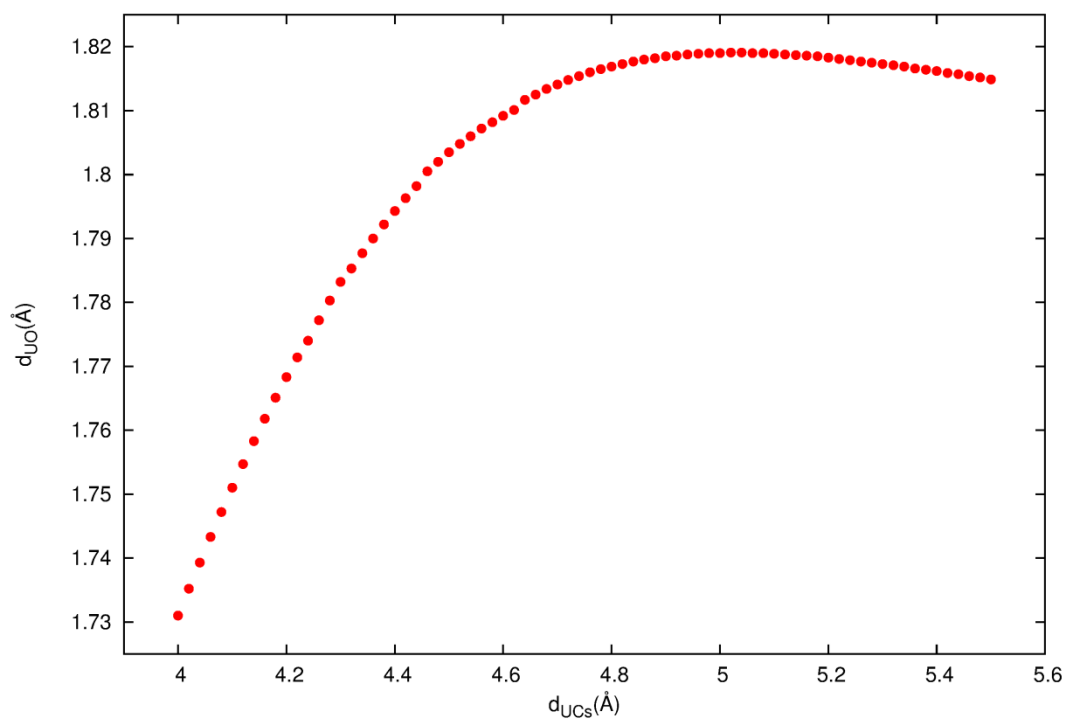

**Figure S4.** U-O vs U-Cs distances obtained in the cluster calculations (U-Cl fixed at 2.68 Å)

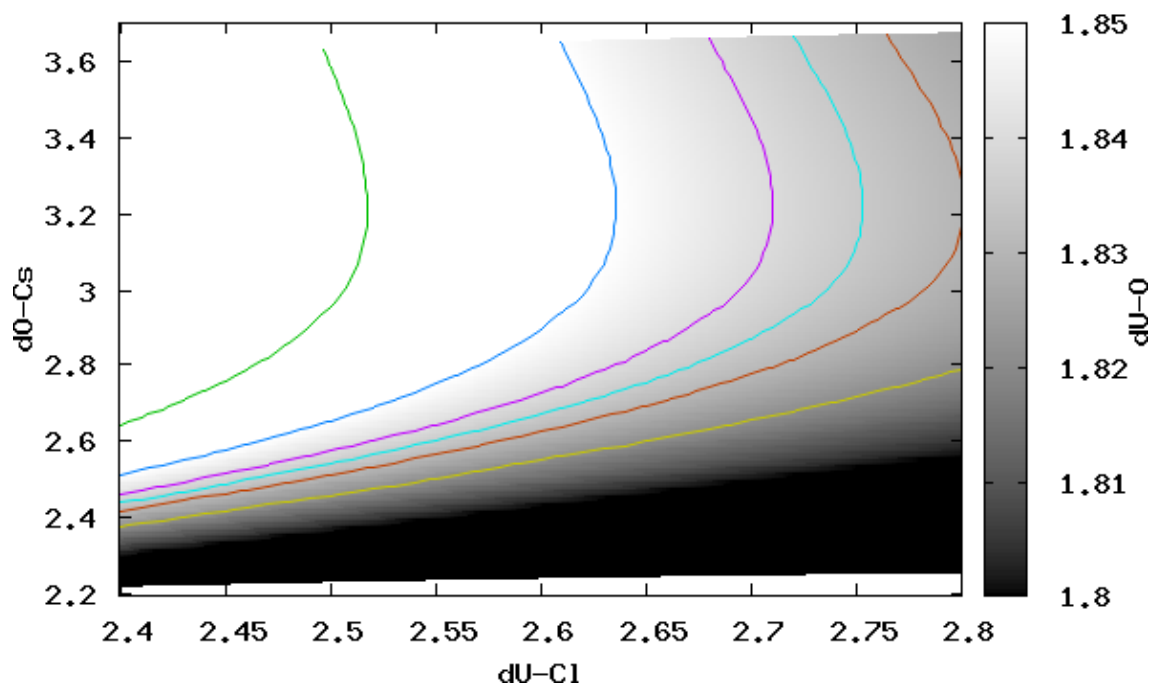

**Figure S5.** Contour lines and color mapping of U-O distance versus U-Cl and O-Cs distances, obtained in the cluster calculations (PBE functional)

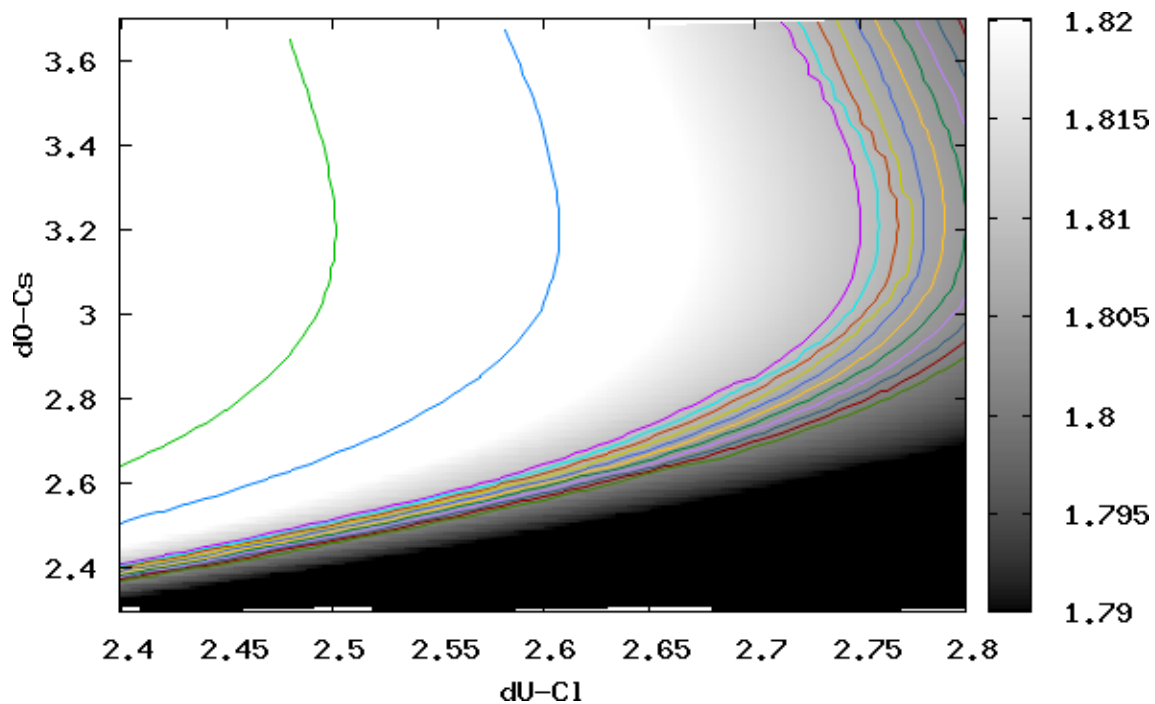

**Figure S6.** Contour lines and color mapping of U-O distance versus U-Cl and O-Cs distances, obtained in the cluster calculations (B3LYP functional)
